# Supplementary material for: Space-Time Trends in Lassa Fever in Sierra Leone by ELISA Serostatus, 2012–2019
Source: Microorganisms. 2021 Mar 12;9(3):586. doi: 10.3390/microorganisms9030586 (PMC8000031; doi:10.3390/microorganisms9030586)
Supplement: Supplementary file 1 [file microorganisms-09-00586-s001.pdf]

## Supplemental Information

| Characteristic                      | IgG serostatus <sup>e</sup> |                     | p value <sup>f</sup> |
|-------------------------------------|-----------------------------|---------------------|----------------------|
|                                     | IgG+<br>(n = 1,015)         | IgG-<br>(n = 2,001) |                      |
| Admission status                    |                             |                     | .001                 |
| Admitted                            | 96 (9)                      | 291 (15)            |                      |
| Not admitted                        | 919 (91)                    | 1,710 (85)          |                      |
| Gender                              |                             |                     | .969                 |
| Female                              | 473 (56)                    | 994 (56)            |                      |
| Male                                | 369 (44)                    | 778 (44)            |                      |
| District                            |                             |                     | <.001                |
| Bo                                  | 13 (5)                      | 114 (14)            |                      |
| Kenema                              | 213 (86)                    | 591 (73)            |                      |
| Other                               | 23 (9)                      | 107 (13)            |                      |
| Time since illness onset            |                             |                     | .779                 |
| < 7 days                            | 128 (55)                    | 369 (54)            |                      |
| ≥ 7 days                            | 103 (45)                    | 310 (46)            |                      |
| Season of presentation <sup>a</sup> |                             |                     | .762                 |
| Rainy                               | 541 (54)                    | 1,057 (53)          |                      |
| Dry                                 | 467 (46)                    | 934 (47)            |                      |
| Age, years                          |                             |                     | <.001                |
| < 5                                 | 33 (5)                      | 225 (15)            |                      |
| 5-14                                | 58 (9)                      | 213 (14)            |                      |
| 15-40                               | 399 (62)                    | 819 (55)            |                      |
| > 40                                | 153 (24)                    | 241 (16)            |                      |
| Ag <sup>+</sup> <sup>b</sup>        |                             |                     | .101                 |
| Died                                | 12 (63)                     | 85 (80)             |                      |
| Discharged                          | 7 (37)                      | 21 (20)             |                      |
| Ag-/IgM <sup>+</sup> <sup>c</sup>   |                             |                     | .634                 |
| Died                                | 24 (34)                     | 40 (31)             |                      |
| Discharged                          | 47 (66)                     | 91 (69)             |                      |
| Ag-/IgM <sup>-</sup> <sup>d</sup>   |                             |                     | <.001                |
| Died                                | 111 (68)                    | 142 (48)            |                      |
| Discharged                          | 52 (32)                     | 156 (52)            |                      |

**Table S1.** IgG serostatus by age group, Kenema Government Hospital Lassa Fever Ward, 2012-2019. Note. All results expressed as frequencies and percentages unless indicated otherwise. Those characteristics with aggregate frequencies less than their respective aggregate serostatus group sample sizes reflect missing characteristic data.

<sup>a</sup> Rainy and dry seasons were defined as May 1-October 31 and November 1-April 30, respectively.

<sup>b</sup> Ag+ = Samples testing positive according to Ag ELISA (acute Lassa exposure).

<sup>c</sup> Ag-/IgM+ = Samples testing negative according to Ag ELISA and positive according to IgM ELISA (recent Lassa exposure).

<sup>d</sup> Ag-/IgM- = Samples testing negative according to both Ag and IgM ELISA.

<sup>e</sup> IgG serostatus = Immunoglobulin G ELISA test result for detecting convalescent Lassa fever exposure.

<sup>f</sup> Calculated using Pearson's chi-square test assessing general differences in proportions between serostatus groups.

| Characteristic                      | Survival outcome  |                        | p value <sup>c</sup> |
|-------------------------------------|-------------------|------------------------|----------------------|
|                                     | Died<br>(n = 106) | Discharged<br>(n = 29) |                      |
| Admission status                    |                   |                        | .308                 |
| Admitted                            | 78 (74)           | 24 (83)                |                      |
| Not admitted                        | 28 (26)           | 5 (17)                 |                      |
| Gender                              |                   |                        | .978                 |
| Female                              | 51 (49)           | 14 (48)                |                      |
| Male                                | 54 (51)           | 15 (52)                |                      |
| Age, years                          |                   |                        | .178                 |
| < 5                                 | 17 (16)           | 8 (28)                 |                      |
| 5-14                                | 18 (17)           | 8 (28)                 |                      |
| 15-40                               | 58 (56)           | 12 (41)                |                      |
| > 40                                | 11 (11)           | 1 (3)                  |                      |
| District                            |                   |                        | .806                 |
| Bo                                  | 8 (9)             | 3 (10)                 |                      |
| Kenema                              | 74 (80)           | 24 (83)                |                      |
| Other                               | 10 (11)           | 2 (7)                  |                      |
| Time since illness onset            |                   |                        | .501                 |
| < 7 days                            | 35 (46)           | 10 (38)                |                      |
| ≥ 7 days                            | 41 (54)           | 16 (62)                |                      |
| IgG serostatus <sup>a</sup>         |                   |                        | .101                 |
| Positive                            | 12 (12)           | 7 (25)                 |                      |
| Negative                            | 85 (88)           | 21 (75)                |                      |
| Season of presentation <sup>b</sup> |                   |                        | .022                 |
| Rainy                               | 44 (42)           | 19 (66)                |                      |
| Dry                                 | 62 (58)           | 10 (34)                |                      |

**Table S2.** Characteristics of confirmed Lassa fever cases by survival outcome, Kenema Government Hospital Lassa Fever Ward, 2012-2019. Note. All results expressed as frequencies and percentages unless indicated otherwise. Those characteristics with aggregate frequencies less than their respective aggregate serostatus group sample sizes

reflect missing characteristic data. Patient survival outcome was determined at hospital discharge (or following initial consultation for non-hospitalized subjects).

<sup>a</sup> IgG serostatus = Immunoglobulin G ELISA test result for detecting convalescent Lassa fever exposure.

<sup>b</sup> Rainy and dry seasons were defined as May 1-October 31 and November 1-April 30, respectively.

<sup>c</sup> Calculated using Pearson's chi-square test assessing general differences in proportions between serostatus groups.

| Serostatus group /<br>Admission status | Survival outcome  |                         | p value <sup>d</sup> |
|----------------------------------------|-------------------|-------------------------|----------------------|
|                                        | Died<br>(n = 432) | Discharged<br>(n = 400) |                      |
| Overall                                |                   |                         |                      |
| Admitted                               | 146 (34)          | 217 (54)                | <.001                |
| Not admitted                           | 286 (66)          | 183 (46)                |                      |
| Ag <sup>+</sup> <sup>a</sup>           |                   |                         |                      |
| Admitted                               | 78 (74)           | 24 (83)                 | .308                 |
| Not admitted                           | 28 (26)           | 5 (17)                  |                      |
| Ag-/IgM <sup>+</sup> <sup>b</sup>      |                   |                         |                      |
| Admitted                               | 31 (46)           | 116 (78)                | <.001                |
| Not admitted                           | 36 (54)           | 33 (22)                 |                      |
| Ag-/IgM <sup>-</sup> <sup>c</sup>      |                   |                         |                      |
| Admitted                               | 37 (14)           | 77 (35)                 | <.001                |
| Not admitted                           | 222 (86)          | 145 (65)                |                      |

**Table S3.** Hospital admission status by survival outcome, Kenema Government Hospital Lassa Fever Ward, 2012-2019. Note. All results expressed as frequencies and percentages unless indicated otherwise. Those characteristics with aggregate frequencies less than their respective aggregate serostatus group sample sizes reflect missing characteristic data. Patient survival outcome was determined at hospital discharge (or following initial consultation for non-hospitalized subjects).

<sup>a</sup> Ag<sup>+</sup> = Samples testing positive according to Ag ELISA (acute Lassa exposure).

<sup>b</sup> Ag-/IgM<sup>+</sup> = Samples testing negative according to Ag ELISA and positive according to IgM ELISA (recent Lassa exposure).

<sup>c</sup> Ag-/IgM<sup>-</sup> = Samples testing negative according to both Ag and IgM ELISA.

<sup>d</sup> Calculated using Pearson's chi-square test assessing general differences in proportions between serostatus groups.

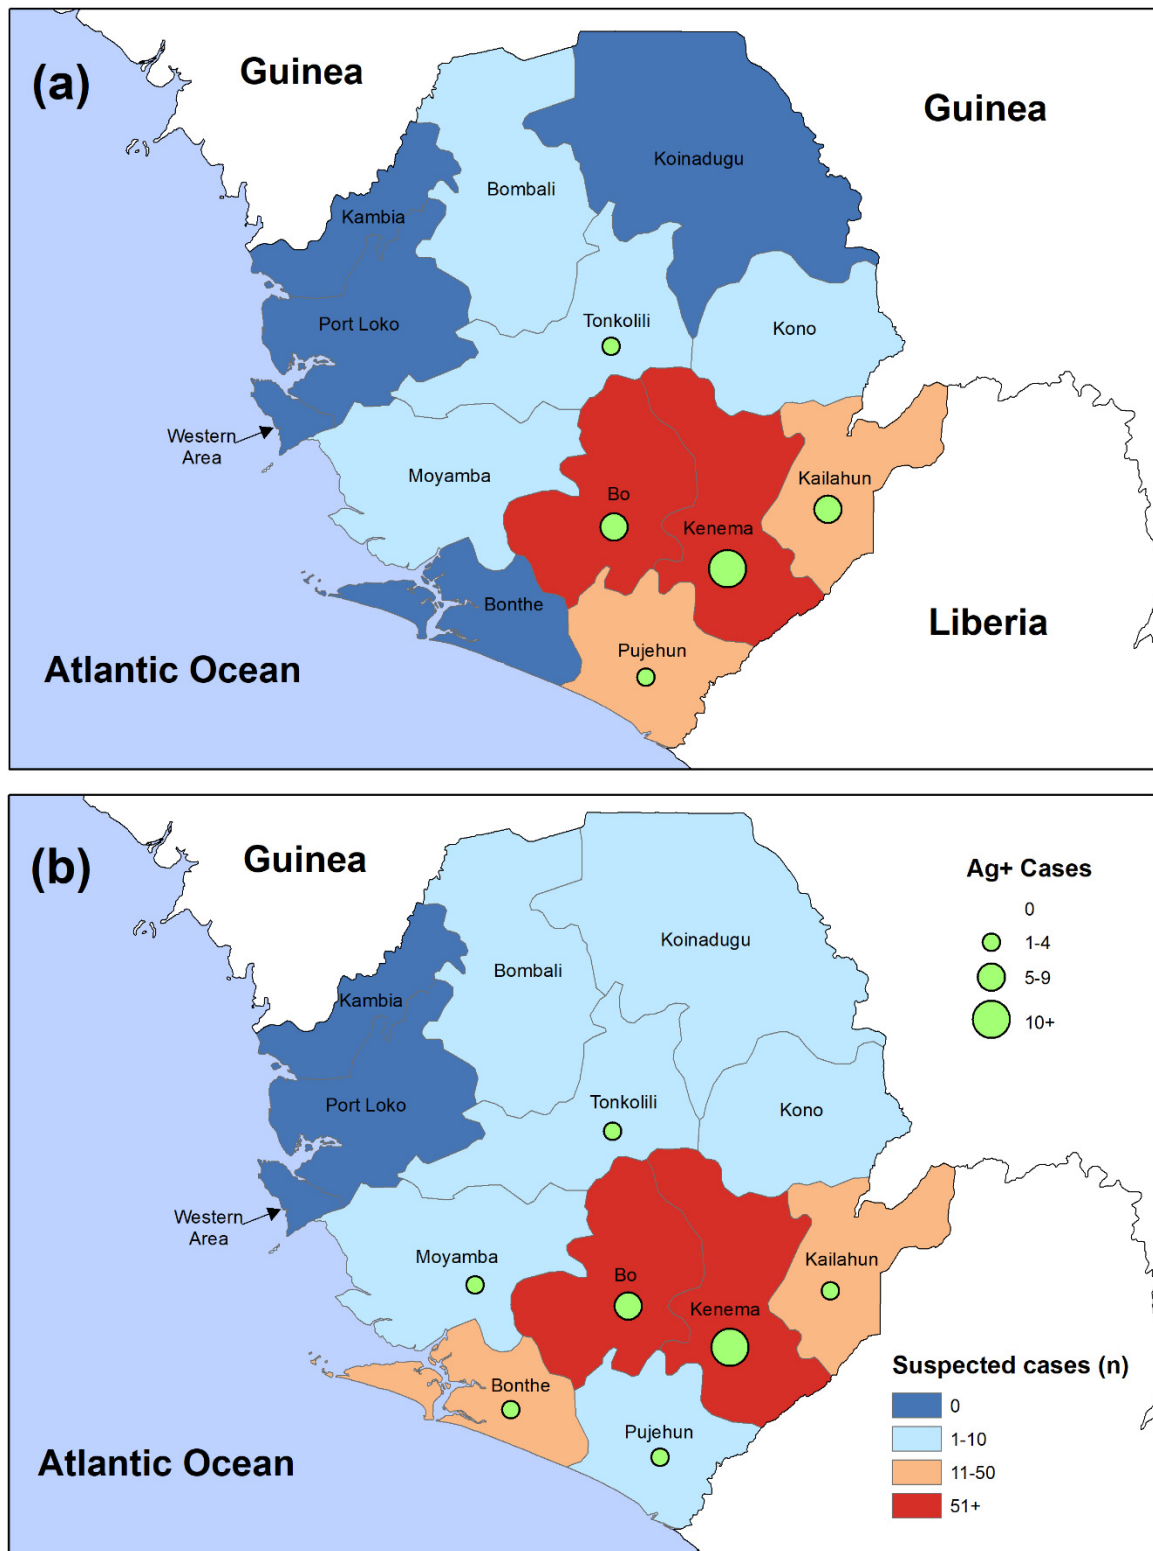

**Figure S1.** Spatial distribution of Lassa fever screenings and confirmed LF cases at Kenema Government Hospital by season of clinical presentation, 2012-2019. (a) Screenings during the rainy season (May 1 to October 31); (b) Screenings during the dry season (November 1 to April 30).
